# Supplementary material for: Context-Dependent Effects of Ranaviral Infection on Northern Leopard Frog Life History Traits
Source: PubMed Central journal article supplement (PMC2965661; doi:10.1371/journal.pone.0013723), 2010-10-28
Supplement: pone.0013723.s001.pdf [file pone.0013723.s001.pdf]

| <b>Responses/Effects</b> | <b>Raw numbers</b>                                                                       | <b>F/H Ratio</b>      | <b>Df</b> | <b>p value</b> |
|--------------------------|------------------------------------------------------------------------------------------|-----------------------|-----------|----------------|
| <b>%Mortality</b>        |                                                                                          |                       |           |                |
| Dose                     | $d1=34.20, d2=48.38, d3=38.41, c=35.03$                                                  | $F_{3, 624} = 0.150$  | 3         | 0.9281         |
| Density                  | $h=42.45, l=35.23$                                                                       | $F_{1, 624} = 10.175$ | 1         | 0.0054*        |
| Dose x                   | $L1= 14.69, L2= 25.55, L3= 32.73, Lc= 14.91, H1= 53.71, H2= 59.79, H3= 46, Hc= 55.15$    | $F_{3, 624} = 0.438$  | 3         | 0.729          |
| <b>Day of Death</b>      |                                                                                          |                       |           |                |
| Dose                     | $d1=50.42, d2=49.14, d3=42.58, c=51.28$                                                  | $H= 13.494$           | 3         | 0.0037*        |
| Density                  | $h=46, l=59$                                                                             | $H= 13.125$           | 1         | 0.0003*        |
| Dose x                   | $L1=62.96, L2=63.38, L3=48.05, Lc=63.23, H1=43.7, H2=47.18, H3=40.18, Hc=44.99$          | $H= 7.813$            | 3         | 0.05*          |
| <b>Dev. Stage</b>        |                                                                                          |                       |           |                |
| Dose                     | $d1=29.93, d2=29.10, d3=29.19, c=31.348$                                                 | $F_{3, 624} = 4.008$  | 3         | 0.008*         |
| Density                  | $h=28.47, l=32.382$                                                                      | $F_{1, 624} = 64.469$ | 1         | 0.0001*        |
| Dose x                   | $L1=31.9, L2=32, L3=30.9, Lc=34.6, H1=28.2, H2=28.2, H3=28.4, Hc=29$                     | $F_{3, 624} = 1.763$  | 3         | 0.153*         |
| <b>Growth Rate</b>       |                                                                                          |                       |           |                |
| Dose                     | $d1=0.010, d2=0.009, d3=0.009, c=0.012$                                                  | $H = 14.196$          | 3         | 0.0027*        |
| Density                  | $h=0.009, l=0.014$                                                                       | $H = 39.252$          | 1         | <0.0001*       |
| Dose x                   | $L1= 0.015, L2= 0.012, L3= 0.010, Lc= 0.018, H1= 0.007, H2= 0.008, H3= 0.009, Hc= 0.010$ | $H = 12.860$          | 3         | 0.0049*        |
